# Supplementary material for: To evaluate the predictive effect of vitamin D on clinical outcomes of infliximab treated Crohn’s disease patients in western China
Source: Research Square preprint supplement (doi:10.21203/rs.3.rs-4677099/v1), 2024-07-27
Supplement: Supplementary file 1 [file Supplementary Table S1.docx]

Table S1 Demographic characteristics of two groups of CD patients

| **Variables** | Remission group | Non-remission group | P |
| --- | --- | --- | --- |
| Number of patients | 49 | 11 |  |
| Age (y) | 27(22~34) | 27(24~42) | 0.297 |
| Gender |  |  |  |
| Female (%) | 12(24.5) | 4(36.4) | 0.462 |
| Male (%) | 37(75.5) | 7(63.6) |
| Height (m) (mean±SD) | 1.67±0.08 | 1.63±0.09 | 0.119 |
| Weight (Kg) (mean±SD) | 55.52±9.24 | 51.55±10.39 | 0.213 |
| BMI | 19.78±2.98 | 19.16±2.42 | 0.518 |
| Underweight (%) | 18(36.7) | 4(36.4) | 1 |
| Normal weight (%) | 28(57.1) | 7(63.6) |
| Pre-obese (%) | 2(4.1) | 0(0) |
| Obese (%) | 1(2) | 0(0) |
| Vit-D |  |  | 0.095 |
| Deficiency(%) | 22(44.9) | 9(81.8) |
| Insufficiency(%) | 22(44.9) | 2(18.2) |
| Sufficiency(%) | 5(10.2) | 0(0) |
| Provinces |  |  |  |
| Chongqing (%) | 44(89.8) | 8(72.7) | 0.055 |
| Sichuan (%) | 2(4.1) | 3(27.3) |
| Yunnan (%) | 3(6.1) | 0(0) |
| Employment situation |  |  |  |
| Unemployed (%) | 21(42.9) | 5(45.5) | 0.875 |
| Employed (%) | 28(57.1) | 6(54.5) |
| Occupation |  |  |  |
| Indoor (%) | 48(98) | 10(90.9) | 0.336 |
| Outdoor (%) | 1(2) | 1(9.1) |
| Marital status |  |  |  |
| Unmarried (%) | 27(55.1) | 5(45.5) | 0.679 |
| Married (%) | 20(40.8) | 6(54.5) |
| Divorced (%) | 2(4.1) | 0(0) |
| Smoking status |  |  |  |
| No (%) | 37(75.5) | 9(81.8) | 1 |
| Yes (%) | 12(24.5) | 2(18.2) |
| Education background |  |  |  |
| Primary school, n (%) | 1(2) | 0(0) | 0.915 |
| Middle school(%) | 8(16.3) | 2(18.2) |
| Senior high school(%)75 | 10(20.4) | 3(27.3) |
| University and above (%) | 30(61.2) | 6(54.5) |
| Course of disease(y)(IQR) | 3.56(2.41~5.86) | 4.14(2.28~7.15) | 0.45 |
| Clinical symptoms |  |  |  |
| Abdominal | 30(61.2) | 6(54.5) | 0.683 |
| Diarrhea | 23(46.9) | 4(36.4) | 0.524 |
| Hematochezia | 3(6.1) | 0(0) | 1 |
| Crissum diseases | 2(4.1) | 2(18.2) | 0.15 |
| Extraintestinal manifestations | 2(4.1) | 0(0) | 1 |
| Fever | 1(2) | 0(0) | 1 |
| Intestinal surgery，n (%) |  |  |  |
| No | 35(71.4) | 8(72.7) | 1 |
| Yes | 14(28.6) | 3(27.3) |
| Perianal surgery，n (%) |  |  |  |
| No | 19(38.8) | 6(54.5) | 0.338 |
| Yes | 30(61.2) | 5(45.5) |
| IMM |  |  |  |
| NO | 37(75.5) | 2(18.2) | 0.001 |
| Yes | 12(24.5) | 9(81.8) |
| IMM type |  |  |  |
| Azathioprine | 11(91.7) | 6(75) | 0.147 |
| Methotrexate | 0(0) | 2(25) |
| Thalidomide | 1(8.3) | 0(0) |
| Diagnosis age, n (%) |  |  |  |
| A1≤16 y | 0(0) | 0(0) | 0.631 |
| A2 17~40y | 42(85.7) | 9(81.8) |
| A3 ＞40y | 6(12.2) | 2(18.2) |
| Disease extent, n (%) |  |  |  |
| L1 | 9(18.4) | 1(9.1) | 0.686 |
| L2 | 7(14.3) | 3(27.3) |
| L3 | 32(65.3) | 7(63.6) |
| L3+L4 | 0(0) | 0(0) |
| L2+L4 | 1(2) | 0(0) |
| Behavior, n (%) |  |  |  |
| B1 | 31(63.3) | 6(54.5) | 0.851 |
| B2 | 15(30.6) | 4(36.4) |
| B3 | 3(6.1) | 1(9.1) |
| Perianal lesions |  |  |  |
| No | 19(38.8) | 5(45.5) | 0.683 |
| Yes | 30(61.2) | 6(54.5) |
