# Supplementary material for: To evaluate the predictive effect of vitamin D on clinical outcomes of infliximab treated Crohn’s disease patients in western China
Source: Research Square preprint supplement (doi:10.21203/rs.3.rs-4677099/v1), 2024-07-27
Supplement: Supplementary file 2 [file Supplementary Table S2.docx]

| Table S2 Factors influencing CDAI at endpoint in CD patients within gender subgroups | | | | | |
| --- | --- | --- | --- | --- | --- |
| Female-Univariate analysis | | | Male-Univariate analysis | | |
| Variables | Beta(95%CI) | P | Variables | Beta(95%CI) | P |
| Vit-D | -2.401(-6.608~1.807) | 0.241 | Vit-D | -2.785(-4.578~-0.992) | 0.003 |
| CRP | 1.026(0.526~1.527) | 0.001 | BMI | -4.089(-8.099~-0.078) | 0.046 |
| ESR | 1.235(0.027~2.443) | 0.046 | CRP | 0.387(0.103~0.672) | 0.009 |
| Hs-CRP | 1.072(0.49~1.655) | 0.001 | ESR | 0.945(0.412~1.478) | 0.001 |
| RBC | -41.611(-78.524~-4.699) | 0.03 | Hs-CRP | 0.351(0.028~0.674) | 0.034 |
| MCV | -1.717(-4.104~0.67) | 0.145 | RBC | -14.209(-31.804~3.386) | 0.111 |
| PA | -0.357(-0.609~-0.105) | 0.009 | Hb | -0.699(-1.194~-0.203) | 0.007 |
| AST | -1.453(-3.75~0.843) | 0.196 | PLT | 0.08(-0.01~0.171) | 0.079 |
| BUN | -14.527(-31.517~2.462) | 0.088 | PA | -0.24(-0.402~-0.079) | 0.004 |
| Ca | -130.415(-280.724~19.893) | 0.084 | ALB | -2.803(-4.95~-0.657) | 0.012 |
| Mg | -186.993(-460.244~86.259) | 0.164 | TBil | -3.123(-6.09~-0.156) | 0.04 |
| P | -65.559(-166.492~35.375) | 0.181 | DBil | -0.641(-1.461~0.18) | 0.123 |
| FBG | 58.166(-17.545~133.877) | 0.119 | BUN | -9.089(-17.352~-0.827) | 0.032 |
| SF-1 | -0.156(-0.316~0.003) | 0.054 | Cr | -1.307(-2.343~-0.27) | 0.015 |
| Folic acid | -8.767(-19.454~1.92) | 0.094 | Ca | -89.455(-195.207~16.298) | 0.095 |
| FBG | 26.762(-8.954~62.477) | 0.127 | P | 65.428(6.498~124.357) | 0.031 |
| Female-Multivariate analysis | | | Folic acid | -2.435(-5.746~0.876) | 0.144 |
| Variables | Beta(95%CI) | P | EPO | 0.036(-0.013~0.086) | 0.145 |
| (constant) | 297.442(131.901~462.984) | 0.002 | TG | -7.539(-15.563~0.486) | 0.065 |
| RBC | -47.136(-81.29~-12.982) | 0.011 | FBG | 9.358(-4.32~23.037) | 0.173 |
| Hs-CRP | 0.886(0.409~1.363) | 0.002 | Male-Multivariate analysis | | |
| MCV | -1.612(-3.189~-0.034) | 0.046 | Variables | Beta(95%CI) | P |
| Mg | 170.816(-72.374~414.006) | 0.15 | (constant) | 214.845(133.778~295.913) | 0 |
|  |  |  | Vit-D baseline | -2.942(-4.93~-0.954) | 0.005 |
|  |  |  | ESR | 0.95(0.1~1.799) | 0.03 |
|  |  |  | Hs-CRP | -0.618(-1.178~-0.058) | 0.032 |
|  |  |  | PA | -0.225(-0.48~0.029) | 0.081 |
