# Supplementary material for: To evaluate the predictive effect of vitamin D on clinical outcomes of infliximab treated Crohn’s disease patients in western China
Source: Research Square preprint supplement (doi:10.21203/rs.3.rs-4677099/v1), 2024-07-27
Supplement: Supplementary file 3 [file Supplementary Table S3.docx]

| Table S3 Factors influencing CDAI at endpoint in CD patients within BMI subgroups | | | | | |
| --- | --- | --- | --- | --- | --- |
| Underweight BMI-Univariate analysis | | | Normal weight BMI-Univariate analysis | | |
| Variables | Beta(95%CI) | P | Variables | Beta(95%CI) | P |
| Vit-D | -2.441(-5.747~0.865) | 0.139 | Vit-D | -2.588(-4.663~-0.513) | 0.016 |
| CRP | 0.322(-0.107~0.75) | 0.133 | CRP | 0.526(0.183~0.869) | 0.004 |
| RBC | -25.783(-44.385~-7.18) | 0.009 | ESR | 1.241(0.622~1.86) | 0 |
| Hb | -0.612(-1.254~0.03) | 0.061 | Hs-CRP | 0.486(0.076~0.896) | 0.022 |
| PA | -0.404(-0.699~-0.108) | 0.01 | Hb | -0.644(-1.333~0.044) | 0.066 |
| ALB | -2.229(-4.957~0.499) | 0.104 | PLT | 0.154(0.022~0.287) | 0.024 |
| BUN | -13.215(-24.063~-2.368) | 0.019 | PA | -0.234(-0.42~-0.048) | 0.015 |
| Cr | -1.02(-2.017~-0.023) | 0.045 | ALB | -1.565(-3.389~0.258) | 0.09 |
| Ca | -105.814(-218.678~7.049) | 0.065 | TBil | -3.813(-7.081~-0.545) | 0.024 |
| K | -32.591(-75.257~10.075) | 0.127 | DBil | -10.849(-24.099~2.402) | 0.105 |
| TC | -47.358(-79.374~-15.342) | 0.007 | BUN | -7.89(-18.348~2.569) | 0.134 |
|  |  |  | Ca | -92.63(-221.794~36.534) | 0.154 |
| Underweight BMI-Multivariate analysis | | | Folic acid | -5.298(-10.127~-0.47) | 0.033 |
| None | | | FBG | 13.517(-2.862~29.896) | 0.101 |
|  |  |  |
| Normal weight BMI-Multivariate analysis | | |
| Variables | Beta(95%CI) | P |
| (constant) | 249.806(143.013~356.6) | 0 |
| Vit-D | -1.713(-4.065~0.638) | 0.141 |
| Hb | -1.505(-2.66~-0.35) | 0.014 |
| PA | 0.243(-0.094~0.58) | 0.145 |
| Folic acid | -7.674(-13.081~-2.266) | 0.009 |
| FBG | 18.203(4.236~32.17) | 0.014 |
