# Supplementary material for: To evaluate the predictive effect of vitamin D on clinical outcomes of infliximab treated Crohn’s disease patients in western China
Source: Research Square preprint supplement (doi:10.21203/rs.3.rs-4677099/v1), 2024-07-27
Supplement: Supplementary file 4 [file Supplementary Table S4.docx]

| Table S4 Factors influencing CDAI at endpoint in CD patients within smoking subgroups | | | | | |
| --- | --- | --- | --- | --- | --- |
| Smoking-Univariate analysis | | | No Smoking-Univariate analysis | | |
| Variables | Beta(95%CI) | P | Variables | Beta(95%CI) | P |
| CRP | 0.583(0.045~1.12) | 0.036 | Vit-D | -4.361(-6.463~-2.258) | 0 |
| ESR | 1.116(0.435~1.798) | 0.004 | BMI | -5.089(-9.567~-0.612) | 0.027 |
| Hs-CRP | 0.478(-0.045~1.002) | 0.07 | CRP | 0.418(0.124~0.712) | 0.006 |
| WBC | 7.345(-2.997~17.688) | 0.148 | ESR | 1.101(0.477~1.725) | 0.001 |
| RBC | -19.6(-43.076~3.876) | 0.094 | Hs-CRP | 0.4(0.055~0.745) | 0.024 |
| Hb | -0.666(-1.19~-0.143) | 0.017 | RBC | -22.623(-41.645~-3.601) | 0.021 |
| MCV | -1.495(-3.395~0.405) | 0.112 | Hb | -0.694(-1.316~-0.071) | 0.03 |
| PLT | 0.149(-0.002~0.299) | 0.053 | PA | -0.348(-0.524~-0.171) | 0 |
| PA | -0.174(-0.379~0.03) | 0.088 | ALB | -1.69(-3.412~0.033) | 0.054 |
| ALB | -2.821(-5.152~-0.489) | 0.022 | AST | -1.318(-2.646~0.011) | 0.052 |
| ALP | 0.477(-0.145~1.099) | 0.121 | ALT | -0.423(-0.961~0.115) | 0.12 |
| TBil | -3.228(-7.309~0.853) | 0.11 | DBil | -0.691(-1.567~0.186) | 0.119 |
| TBA | 13.644(0.363~26.925) | 0.045 | BUN | -14.248(-23.274~-5.223) | 0.003 |
| Uric Acid | -0.251(-0.534~0.031) | 0.076 | Cr | -0.953(-1.745~-0.161) | 0.02 |
| Ca | -151.489(-293.87~-9.109) | 0.039 | Ca | -101.616(-199.84~-3.393) | 0.043 |
| K | -67.65(-119.112~-16.188) | 0.014 | FBG | 14.078(-4.658~32.813) | 0.135 |
| P | 73.01(-33.187~179.208) | 0.157 | Folic acid | -3.107(-6.625~0.411) | 0.081 |
| EPO | 0.039(-0.02~0.098) | 0.163 | EPO | 0.328(-0.057~0.714) | 0.092 |
| TC | -10.757(-27.052~5.538) | 0.17 | TG | -15.724(-36.696~5.247) | 0.136 |
| ANA | -46.333(-102.418~9.752) | 0.097 | FBG | 14.418(-2.444~31.281) | 0.091 |
| Smoking-Multivariate analysis | | | No Smoking-Multivariate analysis | | |
| Variables | Beta(95%CI) | P | Variables | Beta(95%CI) | P |
| (Constant) | 297.957(147.786~448.127) | 0.002 | (Constant) | 267.825(187.196~348.453) | 0 |
| ESR | 1.102(0.381~1.823) | 0.009 | Vit-D | -3.449(-5.406~-1.493) | 0.001 |
| PLT | -0.09(-0.229~0.05) | 0.174 | BMI | -4.214(-7.845~-0.582) | 0.024 |
| K | -62.436(-98.176~-26.697) | 0.004 | CRP | 0.282(0.03~0.533) | 0.029 |
| P | 45.151(-19.373~109.675) | 0.142 | ALT | -0.382(-0.805~0.041) | 0.076 |
