# Supplementary material for: To evaluate the predictive effect of vitamin D on clinical outcomes of infliximab treated Crohn’s disease patients in western China
Source: Research Square preprint supplement (doi:10.21203/rs.3.rs-4677099/v1), 2024-07-27
Supplement: Supplementary file 5 [file Supplementary Table S5.docx]

| Table S5 Factors influencing CDAI at endpoint in CD patients within intestinal surgery subgroups | | | | | |
| --- | --- | --- | --- | --- | --- |
| Without intestinal surgery-Univariate analysis | | | With intestinal surgery-Univariate analysis | | |
| Variables | Beta(95%CI) | P | Variables | Beta(95%CI) | P |
| Vit-D | -2.689(-4.514~-0.863) | 0.005 | Vit-D | -3.301(-7.349~0.746) | 0.103 |
| BMI | -3.175(-7.871~1.522) | 0.18 | BMI | -7.788(-13.745~-1.831) | 0.014 |
| CRP | 0.405(0.049~0.762) | 0.027 | CRP | 0.509(0.147~0.87) | 0.009 |
| ESR | 1.198(0.622~1.774) | 0 | ESR | 0.674(-0.302~1.649) | 0.162 |
| Hs-CRP | 0.391(0.01~0.771) | 0.044 | Hs-CRP | 0.455(-0.007~0.916) | 0.053 |
| Hb | -0.743(-1.264~-0.223) | 0.006 | RBC | -39.361(-58.819~-19.903) | 0.001 |
| PLT | 0.085(-0.02~0.189) | 0.109 | Hb | -0.564(-1.429~0.301) | 0.185 |
| PA | -0.258(-0.426~-0.09) | 0.003 | PA | -0.325(-0.564~-0.086) | 0.011 |
| ALB | -1.772(-3.471~-0.073) | 0.041 | ALB | -2.461(-5.263~0.341) | 0.081 |
| TB | -3.82(-6.833~-0.807) | 0.014 | AST | -3.357(-6.471~-0.244) | 0.036 |
| BUN | -7.707(-16.36~0.946) | 0.079 | ALT | -1.396(-3.114~0.321) | 0.104 |
| Ca | -105.921(-220.327~8.486) | 0.069 | DB | -0.688(-1.556~0.18) | 0.112 |
| P | 46.344(-15.669~108.356) | 0.138 | BUN | -21.028(-33.396~-8.66) | 0.003 |
| Folic acid | -3.001(-7.095~1.093) | 0.144 | Cr | -1.581(-2.446~-0.716) | 0.001 |
| EPO | 0.038(-0.019~0.095) | 0.181 | Uric Acid | -0.198(-0.391~-0.006) | 0.044 |
| TC | -11.971(-26.564~2.621) | 0.104 | Cys-C | -192.486(-372.211~-12.76) | 0.037 |
| Without intestinal surgery-Multivariate analysis | | | Ca | -123.264(-248.487~1.959) | 0.053 |
| Variables | Beta(95%CI) | P | Mg | -206.823(-441.588~27.942) | 0.08 |
| (constant) | 175.188(107.308~243.068) | 0 | TG | -17.69(-41.461~6.08) | 0.131 |
| Vit-D | -2.284(-4.193~-0.376) | 0.021 | Course of disease | 4.512(-0.267~9.291) | 0.063 |
| ESR | 1.493(0.609~2.378) | 0.002 | With intestinal surgery-Multivariate analysis | | |
| Hs-CRP | -0.677(-1.23~-0.124) | 0.018 | Variables | Beta(95%CI) | P |
| PA | -0.157(-0.382~0.067) | 0.161 | (constant) | 244.564(110.727~378.402) | 0.002 |
|  |  |  | Vit-D | -1.223(-4.452~2.006) | 0.422 |
|  |  |  | RBC | -38.407(-64.477~-12.338) | 0.008 |
|  |  |  | ALT | 0.724(-0.805~2.252) | 0.32 |
|  |  |  | BUN | -18.395(-31.307~-5.484) | 0.009 |
|  |  |  | Mg | 163.041(-66.163~392.244) | 0.146 |
