# Supplementary material for: To evaluate the predictive effect of vitamin D on clinical outcomes of infliximab treated Crohn’s disease patients in western China
Source: Research Square preprint supplement (doi:10.21203/rs.3.rs-4677099/v1), 2024-07-27
Supplement: Supplementary file 6 [file Supplementary Table S6.docx]

| Table S6 Factors influencing CDAI at endpoint in CD patients within perianal surgery subgroups | | | | | |
| --- | --- | --- | --- | --- | --- |
| Without perianal surgery-Univariate analysis | | | With perianal surgery-Univariate analysis | | |
| Variables | Beta(95%CI) | P | Variables | Beta(95%CI) | P |
| Vit-D | -3.809(-6.492~-1.125) | 0.007 | Vit-D | -2.007(-4.134~0.12) | 0.064 |
| BMI | -8.606(-15.882~-1.33) | 0.022 | BMI | -2.885(-7.19~1.419) | 0.182 |
| CRP | 0.703(0.297~1.109) | 0.002 | CRP | 0.289(-0.038~0.615) | 0.081 |
| ESR | 0.996(0.159~1.833) | 0.022 | ESR | 1.049(0.447~1.651) | 0.001 |
| Hs-CRP | 0.649(0.202~1.096) | 0.006 | RBC | -18.683(-39.63~2.264) | 0.079 |
| RBC | -22.607(-44.907~-0.308) | 0.047 | Hb | -0.659(-1.236~-0.082) | 0.026 |
| Hb | -0.68(-1.394~0.034) | 0.061 | PA | -0.225(-0.392~-0.058) | 0.01 |
| PLT | 0.138(-0.049~0.325) | 0.141 | ALB | -1.611(-3.163~-0.06) | 0.042 |
| PA | -0.358(-0.593~-0.124) | 0.004 | TB | -3.575(-7.168~0.018) | 0.051 |
| ALB | -3.3(-6.452~-0.149) | 0.041 | Cr | -0.972(-1.937~-0.006) | 0.049 |
| AST | -1.725(-3.511~0.061) | 0.058 | Uric Acid | -0.104(-0.249~0.04) | 0.151 |
| ALT | -1.303(-2.56~-0.045) | 0.043 | Ca | -120.807(-213.428~-28.185) | 0.012 |
| ALP | -0.579(-1.462~0.304) | 0.188 | P | 46.174(-19.869~112.217) | 0.163 |
| DB | -0.724(-1.657~0.209) | 0.122 | TC | -9.84(-22.111~2.43) | 0.11 |
| BUN | -19.471(-30.328~-8.614) | 0.001 | TG | -5.965(-14.542~2.613) | 0.163 |
| Cr | -0.906(-2.021~0.21) | 0.107 | ANA | -46.727(-104.125~10.67) | 0.107 |
| Ca | -113.957(-276.917~49.002) | 0.161 | With perianal surgery-Multivariate analysis | | |
| Mg | -290.823(-543.844~-37.803) | 0.026 | Variables | Beta(95%CI) | P |
| Folic acid | -5.401(-13.424~2.621) | 0.172 | (constant) | 581.893(321.982~841.805) | 0.001 |
| FBG | 11.713(-5.782~29.208) | 0.178 | Vit-D | -4.169(-7.922~-0.416) | 0.033 |
| Course of disease | 4.126(-0.295~8.548) | 0.066 | BMI | 3.112(-1.917~8.141) | 0.195 |
| Without perianal surgery-Multivariate analysis | | | RBC | -30.355(-65.229~4.518) | 0.08 |
| Variables | Beta(95%CI) | P | ALB | 1.465(-1.118~4.048) | 0.232 |
| (constant) | 260.285(128.083~392.487) | 0.001 | TB | -5.7(-9.162~-2.239) | 0.005 |
| Vit-D | -2.991(-5.459~-0.523) | 0.022 | Cr | -2.245(-4.577~0.088) | 0.057 |
| BMI | -5.187(-11.823~1.448) | 0.113 | P | -147.827(-248.852~-46.802) | 0.009 |
| CRP | 0.35(0.013~0.688) | 0.043 | TC | 10.406(-8.586~29.398) | 0.247 |
| Course of disease | 4.604(0.4~8.809) | 0.035 | TG | -11.832(-24.026~0.363) | 0.056 |
| Folic acid | -3.219(-7.869~1.431) | 0.156 | ANA | -82.995(-141.145~-24.845) | 0.01 |
